1 **Potential risk factors associated with human cystic echinococcosis: a semi-structured questionnaire**  
2 **from a large population-based ultrasound cross-sectional study in Eastern Europe and Turkey**

3 **Short title:** questionnaire-derived potential risk factors for human cystic echinococcosis

4 Francesca Tamarozzi<sup>1,2\*</sup>, Okan Akhan<sup>3\*</sup>, Carmen Michaela Cretu<sup>4\*</sup>, Kamenna Vutova<sup>5\*</sup>, Massimo  
5 Fabiani<sup>6</sup>, Serra Orsten<sup>7</sup>, Patrizio Pezzotti<sup>6</sup>, Loredana Gabriela Popa<sup>4</sup>, Valeri Velev<sup>5</sup>, Mar Siles-Lucas<sup>8</sup>,  
6 Enrico Brunetti<sup>2,9,10</sup>, Adriano Casulli<sup>1,11</sup>

7 \* Contributed equally

8

9 <sup>1</sup>WHO Collaborating Centre for the epidemiology, detection and control of cystic and alveolar  
10 echinococcosis (in animals and humans), Department of Infectious Diseases, Istituto Superiore di  
11 Sanità, Rome, Italy; <sup>2</sup>WHO Collaborating Centre for Clinical Management of Cystic Echinococcosis,  
12 Pavia, Italy; <sup>3</sup>Department of Radiology, Faculty of Medicine, Hacettepe University, Ankara, Turkey; <sup>4</sup>C.  
13 Davila University of Medicine and Pharmacy, Colentina Clinical Hospital, Bucharest, Romania;  
14 <sup>5</sup>Specialised Hospital of Infectious and Parasitic Diseases “Prof. Ivan Kirov”, Department of Infectious,  
15 Parasitic and Tropical Diseases, Medical University, Sofia, Bulgaria; <sup>6</sup>Unit of Epidemiology, biostatistics  
16 and mathematical modelling, Department of Infectious Diseases, Istituto Superiore di Sanità, Rome,  
17 Italy; <sup>7</sup>School of Health Services, Hacettepe University, Ankara, Turkey; <sup>8</sup>Instituto de Recursos  
18 Naturales y Agrobiología de Salamanca, CSIC, Spain; <sup>9</sup>Department of Clinical Surgical Diagnostic and  
19 Pediatric Sciences, University of Pavia, Italy; <sup>10</sup>Division of Tropical and Infectious Diseases, San Matteo  
20 Hospital Foundation, Pavia, Italy; <sup>11</sup>European Reference Laboratory for Parasites, Department of  
21 Infectious Diseases, Istituto Superiore di Sanità, Rome, Italy.

22

23 **Correspondence to:** Adriano Casulli, WHO Collaborating Centre for the Epidemiology, Detection and  
24 Control of Cystic and Alveolar Echinococcosis. Department of Infectious Diseases, Istituto Superiore di  
25 Sanità, Rome 00161, Italy. [adriano.casulli@iss.it](mailto:adriano.casulli@iss.it)

26

27 **ABSTRACT**

28 **Background.** Cystic echinococcosis (CE) is a neglected parasitic zoonosis prioritized by the WHO for  
29 control. Hygiene education is included in CE control campaigns but appears of little impact, and the  
30 precise risk factors for human infection are still uncertain. Several works investigated potential risk  
31 factors for CE through questionnaires, mostly carried out on small samples, providing contrasting  
32 results. We present the analysis of risk factors questionnaires administered to participants to the  
33 largest prevalence study on CE conducted in Eastern Europe.

34 **Methodology/Principal Findings.** A semi-structured questionnaire was administered to 24,687 people  
35 from rural Bulgaria, Romania, and Turkey. CE cases were defined individuals with abdominal CE cysts  
36 detected on ultrasound. Variables associated with CE infection at  $p < 0.20$  in bivariate analysis were  
37 included into a multivariable logistic model, with a random effect to account for clustering at village  
38 level. Adjusted odds ratio (AOR) with 95%CI were used to describe the strength of associations. Data  
39 were weighted to reflect the relative distribution of the rural population in the study area by country,  
40 age group and sex. Valid records from 22,027 people were analyzed. According to the main occupation  
41 in the past 20 years, “housewife” (AOR 3.11 [1.51-6.41]) and “retired” (AOR 2.88 [1.09-7.65]) showed  
42 significantly higher odds of being infected compared to non-agricultural workers. “Having relatives  
43 with CE” (AOR 4.18 [1.77-9.88]) was also associated with higher odds of infection. Dog-related and  
44 food/water-related factors were not associated with infection.

45 **Conclusions/Significance.** Our results point to infection being acquired in a “domestic” rural  
46 environment and support the view that CE should be considered more a “soil-transmitted” than a  
47 “food-borne” infection, acquired through a “hand-to-mouth” mechanism. This result helps delineating  
48 the dynamics of infection transmission and have practical implications in the design of specific studies  
49 to shed light on actual sources of infection and inform control campaigns.

50

51

52

53 **AUTHOR SUMMARY**

54 Cystic echinococcosis (CE) is a parasitic disease with high socio-economic impact, mostly affecting  
55 pastoral communities. The causative agent, *Echinococcus granulosus sensu lato*, is naturally  
56 transmitted between dogs and livestock; humans acquire infection through accidental ingestion of  
57 parasite eggs. Hygiene education is among the strategies of CE control campaigns, but appears of little  
58 impact. “Ingestion of contaminated food/water”, and “contact with dogs” are generally mentioned as  
59 the sources of human infection, however actual risk factors are still undefined. Several works  
60 investigated potential risk factors for human CE infection through questionnaires, mostly carried out  
61 on small samples, providing contrasting results. We analysed 22,027 risk factors questionnaires  
62 administered to the participants of the largest prevalence study on CE conducted in Eastern Europe.  
63 We found that being “housewife” and “retired” as the main occupation in the past 20 years, and  
64 “having relatives with CE” were associated with higher odds of CE infection, while dog-related and  
65 food/water-related factors were not associated with infection. Our results indicate that CE may be  
66 considered more a “soil-transmitted” than a “food-borne” infection, acquired through a “hand-to-  
67 mouth” mechanism in a domestic, rural environment. This may help designing specific studies on  
68 pathways of transmission of this neglected parasite.

69

70

71

72

73

74

75

76

77

78

## 79 INTRODUCTION

80 Cystic echinococcosis (CE) is a parasitic zoonotic disease caused by infection with the larval stage  
81 (metacestode) of the tapeworm *Echinococcus granulosus sensu lato* species complex. Its natural life  
82 cycle develops between canids (definitive hosts harbouring the adult stage in the intestine) and  
83 ungulates (intermediate hosts developing the larval stage in internal organs), in a predator-prey  
84 transmission pathway. The majority of human cases are documented in rural areas where livestock  
85 breeding is practiced, consistent with a life cycle mainly involving sheep and dogs [1, 2]. CE has  
86 remarkable health and socio-economic consequences for the rural populations affected [3, 4]. Current  
87 global estimates indicate a prevalence of 1-3 million cases of human CE, with a burden of 1-3.6 million  
88 Disability Adjusted Life Years and over 2 billion US\$ costs accounting for human treatment and  
89 livestock production losses [4, 5]. In 2014, a joint FAO/WHO expert meeting ranked CE as the third  
90 most important food-borne parasitic disease at global level [6]. Further, in 2018 EFSA published a  
91 Scientific Opinion on public health risks associated with food-borne parasites, highlighting CE as “of  
92 the highest relevance in Europe” [7]. The WHO indicates CE as a zoonosis prioritized for control  
93 actions, including in Europe [8, 9].

94 Humans represent an accidental “dead-end” intermediate host for the metacestode of *E. granulosus*,  
95 thus they do not contribute to the perpetuation of the parasite’s life cycle. Only the implementation  
96 of preventive measures against infection, therefore, may reduce sustainably, in the long term, the  
97 burden of CE in humans in the presence of ongoing transmission in animals. This, in turn, may be  
98 controlled through implementation of abattoir surveillance and safe disposal of offal, culling of aged  
99 sheep, periodic deworming of dogs with praziquantel, and vaccination of sheep [10]. Hygiene  
100 education is one of the strategies included in CE control campaigns; however, on its own, this  
101 intervention did not impact significantly on transmission rate to humans, with the exception of Iceland  
102 [10].

103 Humans acquire infection through oral uptake of infective *E. granulosus* eggs; however, there is a  
104 great uncertainty on the actual source attribution and precise risk factors for infection. “Ingestion of

105 contaminated food and water”, together with “direct contact/playing with dogs” are classically  
106 mentioned as the sources of human infection and are biologically plausible potential risk factors.  
107 However, actual data on contamination of and relative attribution from such sources are extremely  
108 scant and uncertain [7, 11, 12]. Further, Chaabane-Banaoues et al [13] found that degree of  
109 environmental contamination by *E. granulosus*-positive dog faeces did not necessarily correlate with  
110 human prevalence of CE, highlighting that multiple ecological factors, likely varying from area to area,  
111 and involving human behaviour and hygiene habits, are at the basis of human transmission.  
112 Knowing the specific pathways of transmission to humans in endemic areas may allow optimizing and  
113 increasing the effectiveness of interventions aiming at the reduction of eggs ingestion by humans.  
114 However, the peculiarity of CE hamper this task. The absence of symptoms of “acute” human  
115 infection, the poorly known and apparently very long incubation time before the developing CE cyst(s)  
116 cause symptoms (if any), and the multiplicity of possible sources of infection, all contribute to the  
117 virtual impossibility to track back the infection episode(s) and specific associated risk behaviours.  
118 Several works investigated the potential risk factors associated with human CE through questionnaires  
119 administered in hospital-based case-control and field-based cross-sectional studies, mostly providing  
120 contrasting results. Recently a systematic reviewed and meta-analysis by Possenti et al [14] aiming to  
121 summarize available data on statistically relevant potential risk factors, indicated that “living in  
122 endemic areas” and “dog ownership” seem to be the most significant potential risk factors for  
123 acquiring CE, consistently resulting from both case-control and cross-sectional studies. On the  
124 contrary, “dog contact” had a weak and non-significant association [14]. The same systematic review  
125 also found that factors related to habits involved in the perpetuation of the parasite life cycle (type of  
126 slaughtering, feeding dogs with raw viscera) were associated with increased risk of infection with  
127 variable statistical significance, while food- and water-borne pathways of transmission did not appear  
128 to impact significantly on human risk of acquiring CE [14]. Environmental contamination was identified  
129 as the main factor associated with CE infection also in more recent cross-sectional surveys carried out  
130 in endemic areas of Morocco [15] and Peru [16]. Factors associated with both parasite life cycle

131 perpetuation and transmission through food or water were, on the contrary, reported as significantly  
132 associated with household risk of human CE in a recent Chinese study [17].

133 Previous questionnaire-based studies investigating potential risk factors associated with human CE  
134 generally tested samples of limited sizes and differed greatly one from the other for what concerns  
135 data collected in the interviews [14]. Furthermore, only about half of the field-based cross-sectional  
136 studies investigating risk factors through questionnaires used imaging as the diagnostic methodology  
137 for case definition, therefore confirming actual CE infection [14]. In 2014-2015, we carried out the  
138 largest research-based field survey on human CE in the context of the project “Human cystic  
139 Echinococcosis ReseArch in CentraL and Eastern Societies” (HERACLES [18]) funded by the European  
140 Commission in 2013. We examined by abdominal ultrasound 24,687 people from rural areas of  
141 Romania, Bulgaria, and Turkey, estimating that 151,000 people with abdominal CE may be currently  
142 present in the rural areas on these countries, a third of them potentially requiring treatment [19].  
143 Here we present the analysis of risk factors questionnaires administered to participants during the  
144 HERACLES ultrasound population-based surveys.

145

## 146 **METHODS**

147 **Ethics statement.** Approval was granted by the Ethics Committees of Specialized Hospital for Active  
148 Treatment of Infectious and Parasitic Diseases “Prof. Ivan Kirov”, Sofia, Bulgaria; Colentina Teaching  
149 Hospital, Bucharest, Romania; and Hacettepe University Hospital, Ankara, Turkey.

150 **Ultrasound surveys.** A detailed description of the US surveys has been published [19]. Briefly,  
151 abdominal ultrasound screening sessions were performed in 2014-2015 on 24,687 people in 50  
152 villages of Bulgaria, Romania, and Turkey, in areas of mid-range endemicity for human CE. The  
153 screenings were carried out on the convenience sample of all volunteers living in the targeted endemic  
154 provinces who presented to the sessions in each village and signed the informed consent form. In all

155 countries, a common protocol for diagnosis and clinical management of CE based on the WHO  
156 Informal Working Group on Echinococcosis (WHO-IWGE) Expert Consensus on clinical management  
157 of echinococcosis [20] was applied. Health education on CE was provided during the pre-screening  
158 project-advertising activities, and by the project team during the surveys with the aid of paper-based  
159 and audio-visual supports. Health education included information the life cycle of the parasite, ways  
160 of transmission to humans and key behaviours favouring the life cycle perpetuation, the  
161 characteristics of the disease in humans, and its treatment.

162 **Questionnaires.** A semi-structured paper-based questionnaire (S1 Text) written in Bulgarian,  
163 Romanian, and Turkish was administered by the survey staff individually to each participant. Children,  
164 when appropriate, were helped answering by parents/guardians. The questionnaire was administered  
165 between the signature of the informed consent form and the ultrasound exam. The questionnaire  
166 included demographic, occupational, and schooling-related questions, as well as questions concerning  
167 knowledge about existence of human CE and occurrence of cases in the family, dog and livestock-  
168 related practices, and food- and drinking water-related habits. After the field surveys, data were  
169 transferred to an electronic database (Excel), and manually curated before analysis. The complete list  
170 of variables for analysis is presented in S1 Table. The analysis of the answers to the question “years of  
171 school attended” was carried out in four “Education” categories. Similarly, the question relative to  
172 dog’s treatment with praziquantel was analysed in four categories. Occupations were grouped into six  
173 categories. The answers to the questions “Do you leave dogs free to roam” and “What do you feed  
174 dogs with” were double-checked for incongruences and manually curated based on answers to the  
175 related questions “Reasons for keeping dogs” and “How do you dispose of viscera”. Similarly, the  
176 answers whether the interviewed carried out agricultural activities in the past 20 years were double-  
177 checked for incongruence and manually curated based on current and past occupation. Ways of  
178 disposal of viscera from slaughtered animals was analysed irrespective of whether the person carried  
179 out home slaughter, as it is common practice in the investigated areas to obtain livestock viscera that  
180 are fed to dogs even without owning livestock and/or slaughtering livestock at home. Finally, due to

181 the extreme heterogeneity of the answers provided, we could not analyse the answers to the  
182 questions addressing the frequency of antiparasitic treatment of dogs, the recognition of the picture  
183 of a CE cyst in the liver of a sheep, the time of the year in which home slaughter was carried-out, the  
184 ways of disposal of dogs' feces, and the access of dogs not owned by the interviewed in his/her  
185 household facilities.

186 **Case definition.** A detailed description of classification of patients and CE cysts has been published  
187 [19]. In brief, infection with CE was based on ultrasound imaging, evaluated by two sonographers  
188 during the screening and confirmed by re-evaluation of each lesion through images and video files  
189 before data analysis. Cysts were identified and staged based on the visualization of pathognomonic  
190 signs of CE etiology, according to the WHO-IWGE Expert Consensus [20]; more stringent conditions  
191 were, however, applied to unilocular cysts, which were ascribed to parasitic etiology only if a double  
192 wall was clearly visible. Lesions suspect of CE, including CL, were investigated as per protocol to define  
193 the nature of the lesion [19]. Due to logistic constraints, only patients visiting the project's referral  
194 hospitals for treatment of CE cysts received chest X-ray for the detection of possible lung CE; none  
195 resulted positive [19]. "CE cases" were defined as all individuals with abdominal CE cysts detected on  
196 ultrasound, independently of whether they reported having received previous treatment for CE.

197 **Statistical analysis.** We excluded from the analysis questionnaires from 128 (0.5%) individuals who  
198 had no CE cysts detected by imaging, but self-reported treatment for CE in the past, as it was not  
199 possible to confirm their infection through clinical documentation. Moreover, we excluded  
200 questionnaires with incomplete information (n=2426; 9.8%) or unresolvable incongruences n=(106;  
201 0.4%), leaving complete records from 22,027 (89.3%) participants available for the analysis. Individuals  
202 (n=38) with suspect lesions, the etiology of which could not be ascertained, were considered as CE-  
203 negative. We described the socio-demographic characteristics and risk profile of the study sample  
204 population through counts and percentages. The prevalence of CE was estimated using sampling  
205 weights to reflect the relative distribution of the rural population in the study area by country, age



206 group and sex, as derived from official population statistics [19]. Prevalence estimates were presented  
207 with 95% confidence intervals (CI), calculated using the Taylor linearization method to account for the  
208 increased variance due to the sampling design. The association between the presence of CE infection  
209 and each potential risk factor was evaluated using the  $\chi^2$  test on the whole 22,027 questionnaires  
210 sample, based on the geographical and ecological contiguity of the entire investigated area. All  
211 variables associated with CE infection at  $p < 0.20$  in bivariate analysis were included into a multivariable  
212 logistic model together with a random effect to account for clustering at village level. Regardless of its  
213 association with CE infection in bivariate analysis, we excluded “current occupation” from the  
214 multivariable analysis to prevent collinearity problems due to its strong association with the variable  
215 “prevalent occupation in the past 20 years” (we assumed the latter as more appropriate to evaluate  
216 the occupation-related risk for an infection that was likely acquired years previously). We scaled  
217 sampling weights according to the actual clusters’ size before running the multilevel model [21]. The  
218 adjusted odds ratio (AOR) with 95% CI were used to describe the strength of the associations. The  
219 Interactions between each risk factor and country were assessed through the Wald test. Country-  
220 specific multivariable models were also computed. Finally, we used the intraclass correlation  
221 coefficient (ICC) to estimate the proportion of the residual variability attributable to the village-related  
222 context [22]. Statistical significance was set at  $p < 0.05$ . The analysis was performed using Stata/MP  
223 version 14.2 (StataCorp LP, College Station, Texas, USA).

224

## 225 **RESULTS**

226 Of 22,027 analysed questionnaires, 13,957 (63.4%) belonged to females and 8070 (36.6%) to males;  
227 105 (0.51%, 95% CI: 0.24-1.07) people had abdominal CE during the ultrasound screenings ( $n=71$   
228 [0.63%, 95% CI: 0.25-1.55] females and  $n=34$  [0.39%, 95% CI: 0.23-0.67] males). The results of the  
229 descriptive and bivariate analysis performed on the whole sample are presented in S1 Table. Ten of

230 the 23 analysed variables were associated with CE infection at  $p < 0.20$  and included into the  
231 multivariable logistic model.

232 The results of the multivariable analysis are presented in Table 1 and graphically depicted in Figure 1.  
233 In relation to the main occupation in the past 20 years, housewives (AOR 3.11; 95% CI 1.51-6.41;  
234  $p = 0.002$ ) and retired persons (AOR 2.88; 95% CI 1.09-7.65;  $p = 0.033$ ) showed an increased odds of  
235 infection compared to non-agricultural or office/service workers. Having had relatives with CE was  
236 positively associated with CE infection (AOR 4.18; 95% CI 1.77-9.88;  $p = 0.001$ ), while individuals with  
237 university or higher level of education showed a significantly reduced odds of infection compared to  
238 those without any formal education (AOR 0.11; 95% CI 0.01-0.88;  $p = 0.038$ ). Other factors were  
239 associated with an increased odds of CE infection but results were only borderline statistically  
240 significant ( $p < 0.1$ ). These were: “Farmer\livestock breeder\other agricultural or veterinary activities  
241 as the main occupation in the past 20 years” (AOR 2.49; 95% CI 0.93-6.66;  $p = 0.068$ ) and “Giving raw  
242 viscera to dogs” (AOR 1.50; 95% CI 0.95-2.38;  $p = 0.080$ ). “Drinking commercial water” was associated  
243 with a reduced odds of CE infection with borderline significance (AOR 0.65; 95% CI 0.40-1.04;  $p = 0.071$ ).

244

245 **Fig 1.** Schematic representation of *E. granulosus* life cycle, pathways of transmission to humans (in  
246 blue), and potential risk factors associated with increased odds of human CE infection identified in our  
247 study (bullet points).

248

249 The estimate of the intraclass correlation coefficient (ICC=16.6%; 95% CI 7.2-33.7) indicates that  
250 almost one fifth of the residual variability not explained by the individual-level variables included into  
251 the multivariable model was likely due to village-related contextual factors.

252 A significant interaction with country was found only for “Main occupation in the past 20 years” and  
253 “Drinking commercial water” (Wald test,  $p < 0.05$ ). The results of the country-specific multivariable

254 models are presented in S2 Table. In general, these were consistent with results from the analysis of  
 255 the whole sample. However, in Bulgaria, a statistically significant increase in odds of CE infection was  
 256 observed for “Student or children <5 years as the main occupation in the past 20 years” (AOR 3.04;  
 257 95% CI 1.10-8.32; p=0.032) and individuals with “primary-level” highest education (AOR 2.98; 95% CI  
 258 1.15-7.69; p=0.024), while these associations, although not statistically significant, appeared reversed  
 259 in Romania and Turkey. Moreover, a significantly increased risk of being infected was observed in  
 260 individuals reporting past agricultural activities in Turkey (AOR 2.91; 95% CI 1.50-5.67; p=0.002), but  
 261 not in those living in Romania and Bulgaria. All the other investigated associations were found to be  
 262 not statistically significant or having the same direction in all countries.

263

264 **Table 1.** Results of the multilevel logistic regression model, including village as random effect.

265 \*Accounting for clustering at village level. \*\*Adjusted OR per linear 10-years increase in age.

266 #Statistically significant interaction with country (Wald test p<0.05)

| Variable                                                                | Adjusted OR | 95% CI*          | p-value*     |
|-------------------------------------------------------------------------|-------------|------------------|--------------|
| SEX                                                                     |             |                  |              |
| Female                                                                  | 1           |                  |              |
| Male                                                                    | 0.98        | 0.64-1.5         | 0.930        |
| AGE**                                                                   | 1.05        | 0.89-1.23        | 0.582        |
| LIVED IN AREAS WITH HIGH DENSITY OF DOGS AND SHEEP IN THE PAST 20 YEARS |             |                  |              |
| No                                                                      | 1           |                  |              |
| Yes                                                                     | 1.94        | 0.84-4.47        | 0.118        |
| MAIN OCCUPATION IN THE PAST 20 YEARS#                                   |             |                  |              |
| Non-agricultural activities or office/service employee                  | 1           |                  |              |
| <b>Housewife</b>                                                        | <b>3.11</b> | <b>1.51-6.41</b> | <b>0.002</b> |
| Farmer/livestock breeder/other agricultural/veterinary activities       | 2.49        | 0.93-6.66        | 0.068        |
| Students and children <5 years of age                                   | 1.31        | 0.61-2.85        | 0.487        |
| <b>Retired</b>                                                          | <b>2.88</b> | <b>1.09-7.65</b> | <b>0.033</b> |
| Unemployed                                                              | 2.09        | 0.51-8.58        | 0.309        |
| AGRICULTURAL ACTIVITIES IN THE PAST 20 YEARS                            |             |                  |              |
| No                                                                      | 1           |                  |              |
| Yes                                                                     | 1.47        | 0.64-3.36        | 0.366        |
| EDUCATION                                                               |             |                  |              |
| None                                                                    | 1           |                  |              |
| Primary                                                                 | 1.05        | 0.55-2.00        | 0.893        |
| Secondary/High school                                                   | 1.15        | 0.60-2.18        | 0.678        |
| <b>University/Postgraduate</b>                                          | <b>0.11</b> | <b>0.01-0.88</b> | <b>0.038</b> |
| KNOWLEDGE OF HUMAN CE EXISTENCE                                         |             |                  |              |
| No                                                                      | 1           |                  |              |
| Yes                                                                     | 1.78        | 0.69-4.58        | 0.235        |
| KNOWN PRESENCE OF RELATIVES WITH CE                                     |             |                  |              |
| No                                                                      | 1           |                  |              |
| <b>Yes</b>                                                              | <b>4.18</b> | <b>1.77-9.88</b> | <b>0.001</b> |
| RAW VISCERA GIVEN TO DOGS                                               |             |                  |              |

|                         |      |           |       |
|-------------------------|------|-----------|-------|
| No                      | 1    |           |       |
| Yes                     | 1.50 | 0.95-2.38 | 0.080 |
| DRINK COMMERCIAL WATER# |      |           |       |
| No                      | 1    |           |       |
| Yes                     | 0.65 | 0.40-1.04 | 0.071 |

267

## 268 DISCUSSION

269 WHO advocates control of CE [8]. Reference control strategies include “health education”; however,  
270 the content and target population of such educational intervention(s) varied between campaigns and,  
271 overall, did not appear having significantly affected the transmission of CE to humans [10]. Knowing  
272 more precisely human infection risk factors in endemic areas may allow optimizing and modelling  
273 hygiene-based educational interventions aiming at the reduction of eggs ingestion by humans.  
274 However, this is particularly difficult due to the absence of symptoms of “acute” human infection and  
275 the unknown, likely months to years-long, interval between infection and diagnosis. Multiple potential  
276 habits/sources may result in human ingestion of infective parasite eggs. However, so far very few  
277 experimental data are available on the actual contamination of different materials by *E. granulosus*  
278 eggs [12], and the analyses of questionnaires investigating potential risk factors gave contrasting  
279 results [14]. Our questionnaire-based study, carried out in the context of the largest research-based  
280 cross-sectional survey on human CE [19], applying stringent case definition, may help better framing  
281 the general characteristics of risk factors for human infection.

282 Owned dog-related factors (owing dogs and length of dog ownership, reason for keeping dogs,  
283 allowing dogs to roam or enter the house, antiparasitic treatment of dogs) were not found associated  
284 with odds of human infection. This may result from the dog husbandry habits in the investigated areas,  
285 which may allow environmental contamination with parasite eggs even outside the premises of the  
286 interviewed person; also a variable meaning of “owing” a dog in different areas, as also noted in  
287 previous studies, may have influenced this result [15]. Food/drinking water-related factors such as  
288 consumption of unwashed vegetables and of potentially unsafe water were also not associated with  
289 increased odds of human infection. While these results indicate that food- and water-borne

290 transmission may not play a major role, increased risk of infection deriving from occupations  
291 (housewife, retired) related to the household point to infection being acquired in a “domestic” rural  
292 environment. This is also supported by the increased odds of infection associated with having an  
293 agricultural-related occupation. Increased risk of infection associated with having relatives with CE, as  
294 well as the trend toward in increased risk associated with having some knowledge of the existence of  
295 human CE, may derive from living in a context where human CE and therefore where its transmission  
296 cycle is common. This transmission cycle is perpetuated by the habit of giving raw viscera to dogs,  
297 individuated as a risk factor of borderline significance in our analysis, as it induces dog infection and  
298 in turn environmental contamination through shedding of infected feces. The fact that another habit  
299 potentially favouring the transmission of *E. granulosus* to dogs, that is home slaughtering of livestock,  
300 was not associated with increased odds of infection may be due to the common habit of obtaining  
301 viscera to feed dogs even if the household did not own and/or did not carry out informal slaughter, as  
302 also occurs in other geographical areas [15]. The risk deriving from environmental contamination  
303 appears reduced by socio-economic related factors: in our analysis, having a high education and  
304 drinking commercial water were associated with reduced odds of infection. Lack of association with  
305 sex and age could be explained by the common exposure, in rural areas, of both sexes and at all ages.  
306 However, although not statistically significant, an increase in infection prevalence with age can be  
307 anyway observed in our data set, as expected for a chronic infection.

308 Our results are overall in line with those of the systematic review of Possenti and colleagues [14], and  
309 with the recent work carried out in Peru and Morocco [15, 16], individuating environmental  
310 contamination and likely “hand-to-mouth” transmission as the main factor responsible for CE  
311 transmission, while food/water source attribution likely not of primary importance.

312 Our study has some limitations deserving discussion. First, limitation deriving from recall bias is  
313 intrinsic to the study design and the peculiarity of a chronic, often asymptomatic, infection such as CE.  
314 Second, it is possible the health education information provided before the administration of the

315 questionnaire would have influenced the answer to the question related to knowledge of CE in  
316 humans. However, if this was systematically the case, it would have rather resulted in no association  
317 between infection and answer to this question, contrary to what we found. Third, it was difficult to  
318 ascertain whether participants replied to questions in terms of their “common habits” or “even  
319 occasional” behaviours. This was evident from the mismatch observed between related questions  
320 such as: “Do you leave dogs free to roam – reply “No”” and “Reasons to keep dogs – reply “hunting”  
321 or “herding””; “What do you feed dogs with – reply “only commercial/cooked food”” and “How do  
322 you dispose of viscera – reply “give raw to dogs””; and “Agricultural activities carried out in the past  
323 20 years – reply “No” and agricultural-related current and/or past occupations. These problem could  
324 have been reduced by pre-testing the questionnaire, which was not carried out due to time constraint  
325 deriving from the organization timeline of ultrasound surveys. Another limitation may derive from the  
326 possible inclusion of some CE-infected individuals among the non-infected group. This may have  
327 derived from the stringent case definition applied in the survey [19], and the impossibility of  
328 performing a chest radiograph to all survey participants for the detection of isolated lung cyst. Finally,  
329 it is worth highlighting that the variables included in our questionnaires were not investigating  
330 infection transmission behaviours directly, but can be regarded as indirect driving factors related to  
331 socio-economic status and hygiene-related habits.

332 To conclude, our study carried out in the context of the largest research-based cross-sectional study  
333 conducted on CE [19], contributes to the scientific knowledge of potential risk factors of human CE.  
334 Our results support the paradigm shift view that CE should be mainly considered an “environmental-  
335 borne” infection, similar to the “classical” soil-transmitted helminthiases, transmitted through a  
336 “hand-to-mouth” mechanism, while food/water-borne transmission may be of secondary importance.  
337 In both cases, however, the “community risk” in endemic areas should be highlighted, aside of  
338 “individual” risk factors. These concepts, supported by our results, are pivotal in delineating the  
339 general dynamics of infection transmission and have important practical implications for public health  
340 policy makers across endemic countries in the design control campaigns. However, more

341 country/community-specific and habits-specific questionnaires, as well as experimental studies on  
342 parasite contamination of matrices, are needed to shed light on actual sources of infecting eggs and  
343 on behaviours at risk for individual infection.

344

#### 345 **ACKNOWLEDGMENTS**

346 We are grateful to Prof Thomas Junghanss (Head of the Section of Clinical Tropical Medicine at  
347 Heidelberg University Hospital and Chair of the WHO Informal Working Group on Echinococcosis),  
348 Bernadette Abela-Ridder (Team Leader, Neglected Zoonotic Diseases, Department of the Control of  
349 Neglected Tropical Diseases, WHO), and Johanna Takkinen (Head of Disease Programme Food- and  
350 Waterborne Diseases and Zoonoses, European Centre for Disease Prevention and Control) for  
351 supporting this research. We are thankful to the staff who participated to the field work in Bulgaria  
352 (Rossitza Chipeva, Branimir Golemanov, Marin Muhtarov), in Romania (Corina Manuela Constantin,  
353 Denisa Janta, Patricia Mihailescu, Marius Petrutescu, Alexandru Cosmin Popa, Mircea Ioan Popa), and  
354 in Turkey (Devrim Akinci, Turkmen Ciftci ).

355 We also thank Madalina Preda, Adelina Silvana Gheorghe, Andrei Capraru, Luca Stan Sion and Zlatka  
356 Todorova Muhtarova, who volunteered to help during the fieldwork.

357

#### 358 **REFERENCES**

- 359 1. Deplazes P, Rinaldi L, Alvarez Rojas CA, Torgerson PR, Harandi MF, Romig T, et al. Global  
360 Distribution of Alveolar and Cystic Echinococcosis. *Adv Parasitol.* 2017;95:315-493.
- 361 2. Romig T, Deplazes P, Jenkins D, Giraudoux P, Massolo A, Craig P, et al. Ecology and life cycle  
362 patterns of Echinococcus species. *Adv Parasitol.* 2017;95:213-314.

- 363 3. WHO/Department of control of neglected tropical diseases. Intergrating neglected tropical  
364 diseases into global health and development: fourth WHO report on neglected tropical diseases 2017.  
365 World health Organization, geneva, Switzerland. WHO/HTM/NTD/2017.1. 2017.
- 366 4. Budke CM, Deplazes P, Torgerson PR. Global socioeconomic impact of cystic echinococcosis.  
367 Emerg Infect Dis. 2006;12(2):296-303.
- 368 5. W.H.O. Available from: <https://www.who.int/echinococcosis/en/>; accessed on 21st February  
369 2019.
- 370 6. F.A.O./W.H.O. Multicriteria-based ranking for risk management of food-borne parasites.  
371 Microbiological Risk Assessment Series No 23. Rome. 302p. 2014.
- 372 7. E.F.S.A., BIOHAZ., panel., Koutsumanis K, Allende A, Alvarez-Ordóñez A, et al. Scientific opinion  
373 on the public health risks associated with food-borne parasites. EFSA Journal. 2018;16(12):5495;  
374 113pp.
- 375 8. WHO. Accelerating work to overcome the global impact of neglected tropical diseases - a  
376 roadmap for implementation. 2012. Geneva, Switzerland.
- 377 9. W.H.O. Available from: [http://www.who.int/neglected\\_diseases/news/new-approach-  
378 needed-to-tackle-echinococcosis-europe/en/](http://www.who.int/neglected_diseases/news/new-approach-needed-to-tackle-echinococcosis-europe/en/); accessed on 21st February 2019.
- 379 10. Craig PS, Hegglin D, Lightowlers MW, Torgerson PR, Wang Q. Echinococcosis: Control and  
380 Prevention. Adv Parasitol. 2017;96:55-158.
- 381 11. Torgerson P, Devleeschauwer B, Praet N, Speybroeck N, Willingham AL, Kasuga F, et al. World  
382 Health Organization estimates of the global and regional disease burden of 11 foodborne parasitic  
383 diseases, 2010: a data synthesis. PLoS Med. 2015;12(12):e1001920.
- 384 12. Alvarez Rojas CA, Mathis A, Deplazes P. Assessing the contamination of food and the  
385 environment with Taenia and Echinococcus eggs and their zoonotic transmission. Curr Clinical Micro  
386 Rpt. 2018; <https://doi.org/10.1007/s40588-018-0091-0>.



- 387 13. Chaabane-Banaoues R, Oudni-M'rad M, Cabaret J, M'rad S, Mezhoud H, Babba H. Infection of  
388 dogs with *Echinococcus granulosus*: causes and consequences in an hyperendemic area. *Parasit*  
389 *Vectors*. 2015;17(8):231.
- 390 14. Possenti A, Manzano-Roman R, Sanchez-Ovejero C, Boufana B, La Torre G, Siles-Lucas M, et  
391 al. Potential Risk Factors Associated with Human Cystic Echinococcosis: Systematic Review and Meta-  
392 analysis. *PLoS Negl Trop Dis*. 2016;10(11):e0005114.
- 393 15. Chebli H, Laamrani El Idrissi A, Benazzouz M, Lmimouni BE, Nhammi H, Elabandouni M, et al.  
394 Human cystic echinococcosis in Morocco: Ultrasound screening in the Mid Atlas through an Italian-  
395 Moroccan partnership. *PLoS Negl Trop Dis*. 2017;11(3):e0005384.
- 396 16. Tamarozzi F, Hou A, Morales ML, Giordani MT, Vilca F, Mozo K, et al. Prevalence and Risk  
397 Factors for Human Cystic Echinococcosis in the Cusco Region of the Peruvian Highlands Diagnosed  
398 Using Focused Abdominal Ultrasound. *Am J Trop Med Hyg*. 2017;96(6):1472-7.
- 399 17. Yuan R, Wu H, Zeng H, Lui P, Xu Q, Gao L, et al. Prevalence of and risk factors for cystic  
400 echinococcosis among herding families in five provinces in western China: a cross-sectional study.  
401 *Oncotarget*. 2017;23(8):91568-76.
- 402 18. HERACLES (Human cystic Echinococcosis ReseArch in CentraL and Eastern Societies) Available  
403 from: <http://www.heracles-fp7.eu/>; Accessed on 21st February 2019.
- 404 19. Tamarozzi F, Akhan O, Cretu CM, Vutova K, Akinci D, Chipeva R, et al. Prevalence of abdominal  
405 cystic echinococcosis in rural Bulgaria, Romania, and Turkey: a cross-sectional, ultrasound-based,  
406 population study from the HERACLES project. *Lancet Infect Dis*. 2018;18(7):769-78.
- 407 20. Brunetti E, Kern P, Vuitton DA, Writing Panel for the W-I. Expert consensus for the diagnosis  
408 and treatment of cystic and alveolar echinococcosis in humans. *Acta Trop*. 2010;114(1):1-16.
- 409 21. Rabe-Hesketh S, Skrondal A. Multilevel modelling of complex survey data. *J R Stat Soc Ser A*  
410 *Sta Soc*. 2006;169:805-27.

411 22. Merlo J, Chaix B, Yang M, Lynch J, Rastam L. A brief conceptual tutorial on multilevel analysis in  
412 social epidemiology: interpreting neighbourhood differences and the effect of neighbourhood  
413 characteristics on individual health. *J Epidemiol Community Health*. 2005;59(12):1022-8.

414

#### 415 **SUPPORTING INFORMATION LEGENDS**

416 **S1 Text.** Semi-structured paper-based questionnaire (English version).

417 **S1 Table.** Results of the bivariate analysis performed on the whole sample. \*Calculated by weighting  
418 data according to the rural population size by country, sex and age group. \*\* Accounting for clustering  
419 at village level. NC, not calculable.

420 **S2 Table.** Results of the multilevel logistic regression model, including village as random effect.

421 \*Accounting for clustering at village level. \*\*Adjusted OR per linear 10-years increase in age.

422 °BULGARIA: variance between villages 0.21 (95% CI 0.02-2.17), intra-village correlation 6.0 (95% CI  
423 0.6-39.7); ROMANIA: variance between villages 0.30 (95% CI 0.03-3.51), intra-village correlation 8.3  
424 (95% CI 0.8-51.6); TURKEY: variance between villages 1.48 (95% CI 0.32-6.96), intra-village correlation  
425 31.1 (95% CI 8.8-67.9).

426 **S1 Checklist.** STROBE checklist

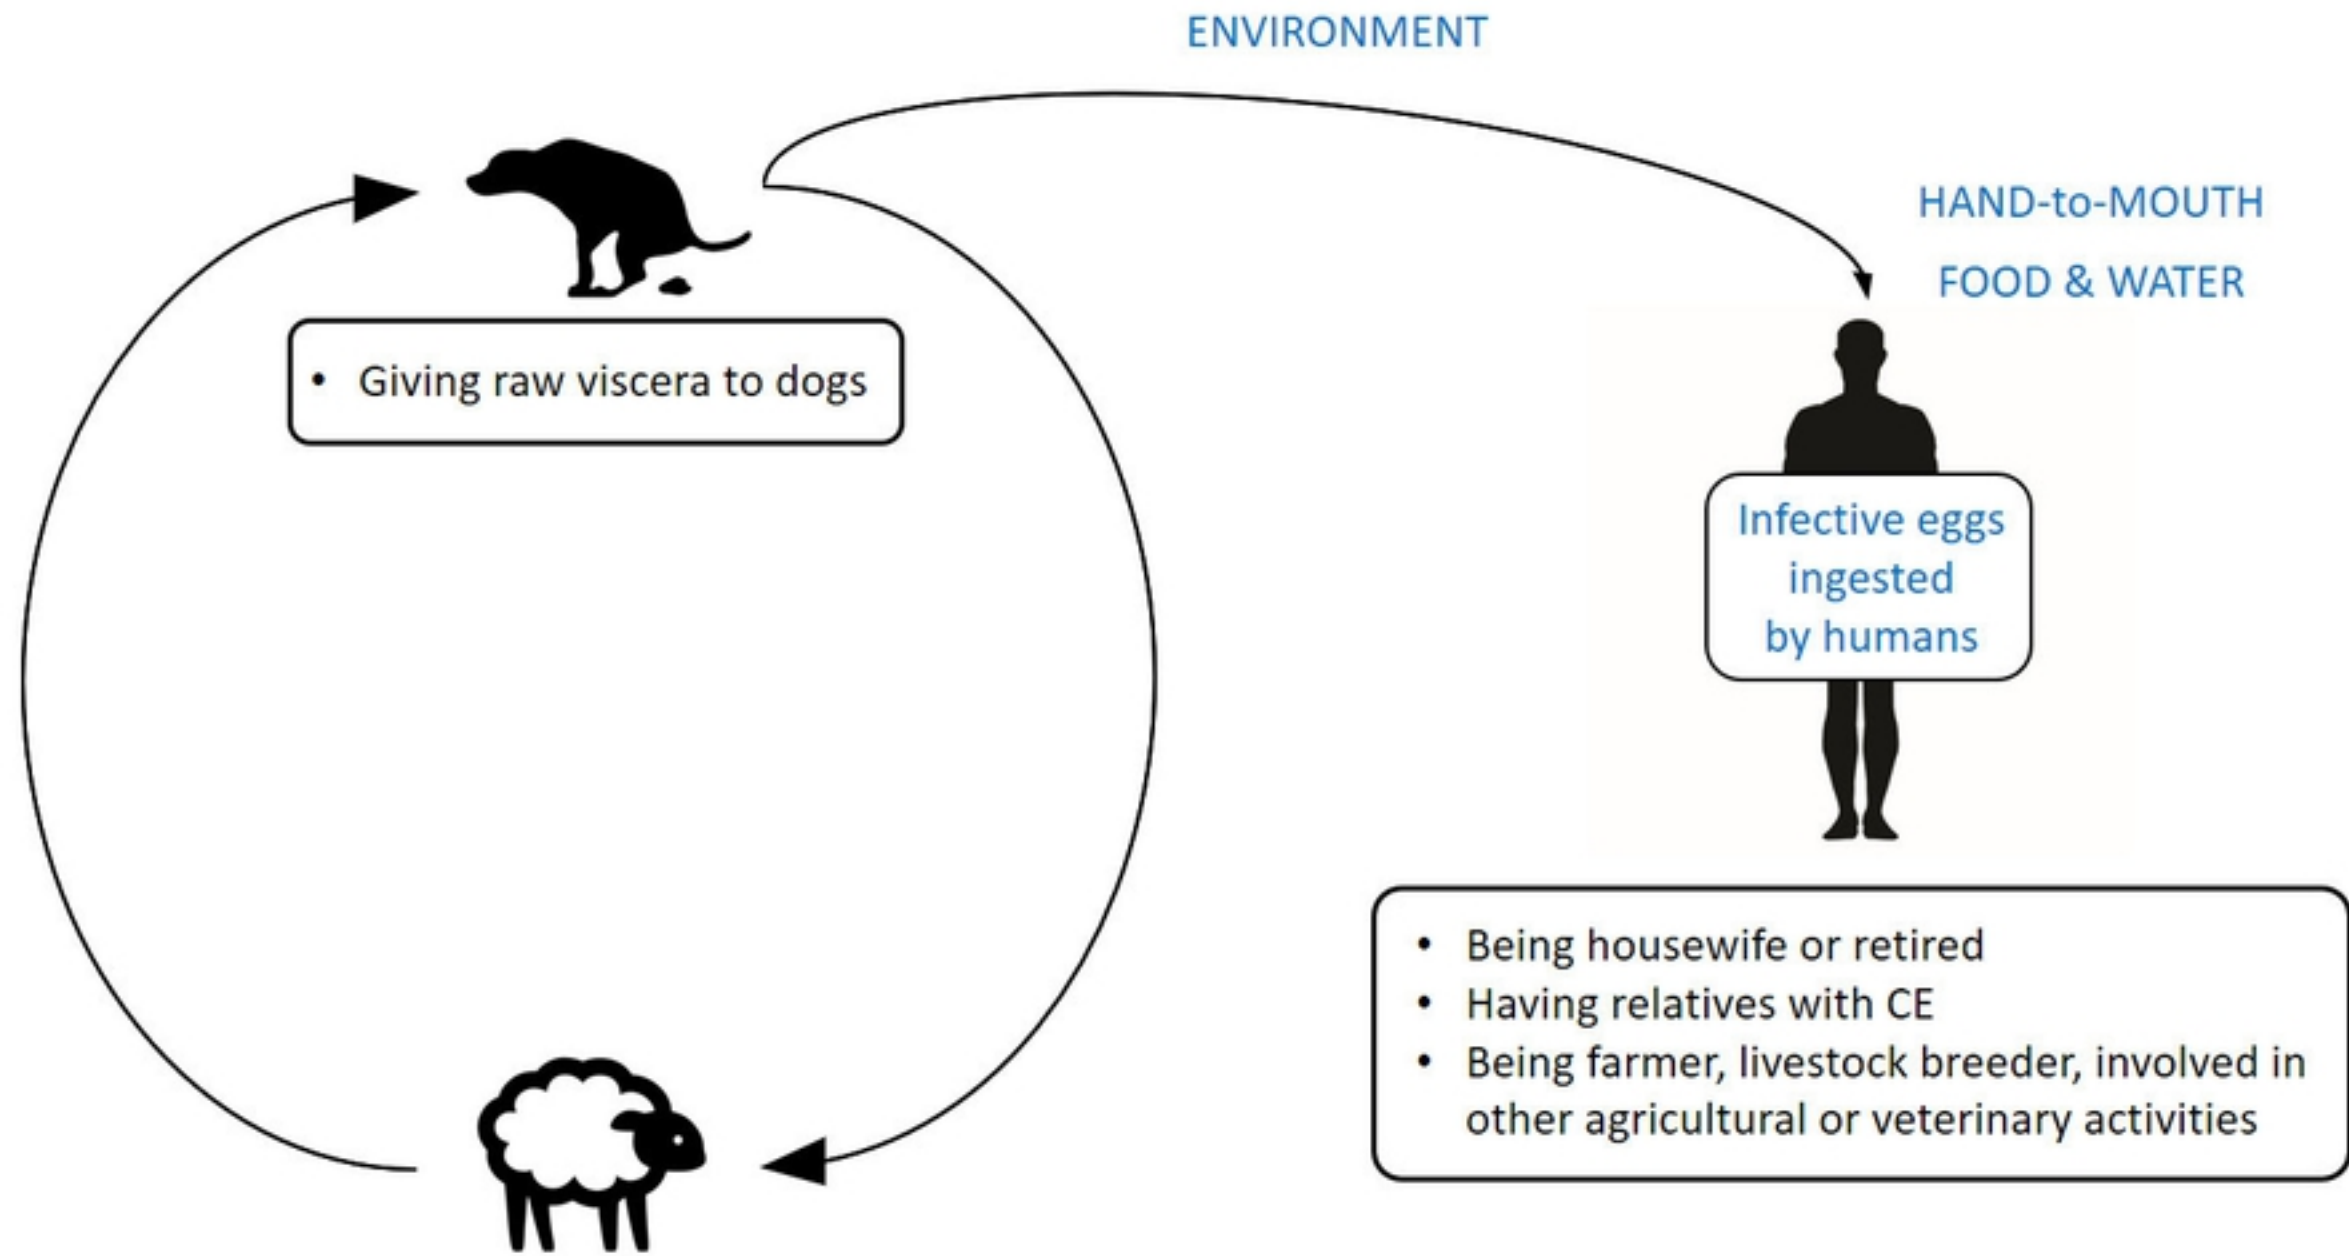

Figure 1
